1

2 **Comprehensive Analysis of Human Subtelomeres by Whole Genome Mapping**

3

4 Eleanor Young<sup>1</sup>, Heba Z. Abid<sup>1</sup>, Pui-Yan Kwok<sup>2,3,4</sup>, Harold Riethman<sup>5§</sup>, Ming Xiao<sup>1,6,§</sup>

5

6

7 <sup>1</sup>School of Biomedical Engineering and <sup>6</sup>Institute of Molecular Medicine and Infectious Disease  
8 in the School of Medicine, Drexel University, Philadelphia, PA

9 <sup>2</sup>Cardiovascular Research Institute, <sup>3</sup>Department of Dermatology, and <sup>4</sup>Institute for Human  
10 Genetics, University of California–San Francisco, San Francisco, CA

11 <sup>5</sup> Medical Diagnostic & Translational Sciences, Old Dominion University, Norfolk, VA

12

13 §Corresponding authors: Harold Riethman ([hriethma@odu.edu](mailto:hriethma@odu.edu)), Ming Xiao  
14 ([Ming.Xiao@drexel.edu](mailto:Ming.Xiao@drexel.edu))

15

16 **Abstract:**

17 Detailed comprehensive knowledge of the structures of individual long-range telomere-  
18 terminal haplotypes are needed to understand their impact on telomere function, and to  
19 delineate the population structure and evolution of subtelomere regions. However, the  
20 abundance of large evolutionarily recent segmental duplications and high levels of large  
21 structural variations have complicated both the mapping and sequence characterization of  
22 human subtelomere regions. Here, we use high throughput optical mapping of large single DNA  
23 molecules in nanochannel arrays for 154 human genomes from 26 populations to present a  
24 comprehensive look at human subtelomere structure and variation. The results catalog many  
25 novel long-range subtelomere haplotypes and determine the frequencies and contexts of  
26 specific subtelomeric duplicons on each chromosome arm, helping to clarify the currently  
27 ambiguous nature of many specific subtelomere structures as represented in the current  
28 reference sequence (HG38). The organization and content of some duplicons in subtelomeres  
29 appear to show both chromosome arm and population-specific trends. Based upon these trends  
30 we estimate a timeline for the spread of these duplication blocks.

31

32 **Author Summary:**

33 The ends of human chromosomes have caps called telomeres that are essential. These  
34 telomeres are influenced by the portions of DNA next to them, a region known as the  
35 subtelomere. We need to better understand the subtelomeric region to understand how it  
36 impacts the telomeres. This subtelomeric region is not well described in the current references.  
37 This is due to large variations in this region and portions that are repeated many times, making  
38 current sequencing technologies struggle to capture these regions. Many of these variations are  
39 evolutionary recent. Here we use 154 different samples from the 26 geographic regions of the  
40 world to gain a better understanding of the variation in these regions. We found many new

41 haplotypes and clarified the haplotypes existing in the current reference. We then examined  
42 population and chromosome specific trends.

### 43 **Introduction:**

44 Telomere-adjacent DNA helps regulate telomere (TTAGGG)<sub>n</sub> tract lengths and telomere  
45 integrity. A family of long noncoding telomeric repeat-containing RNA (TERRA) molecules is  
46 transcribed from subtelomeres into (TTAGGG)<sub>n</sub> tracts (1-3), and association of TERRA with  
47 other shelterin components and telomeric DNA is necessary for telomere integrity and function  
48 (1, 4, 5). Subtelomeric DNA elements cis to (TTAGGG)<sub>n</sub> tracts regulate both TERRA levels and  
49 haplotype-specific (TTAGGG)<sub>n</sub> tract lengths and stabilities (4, 6-9) with evidence for epigenetic  
50 modulation of these effects (9-12). Extended subtelomere regions contain both coding and non-  
51 coding transcripts, the abundance and regulation of which are likely to depend upon the specific  
52 haplotypes and copy number of the DNA encoding them. Some of these transcripts such as  
53 those encoding human WASH proteins are clearly functional, but most are not well-  
54 characterized (13-17). *De novo* deletion of specific subtelomeric duplications can cause disease  
55 in some contexts (18). Long-range interactions of telomeres with functional subtelomeric genes  
56 has been observed, with the expression of these genes sometimes regulated in a telomere  
57 length-dependent fashion (19, 20).

58       Large structural variations occur frequently in subtelomeric DNA, often associated with  
59 loss or gain of large pieces of evolutionarily recent segmental duplications. Ambiguities in  
60 sequence localization because of segmental duplication content, as well as the presence of  
61 alternative haplotypes differing by relatively large insertions, deletions, and more complex  
62 sequence organization differences, have contributed to gaps and misassemblies in subtelomeric  
63 regions of the human reference sequence. In the current version (HG38) single haplotypes of  
64 many subtelomeres have been sequenced to the beginning of terminal repeat (TTAGGG)<sub>n</sub>  
65 tracts, whereas others still contain (TTAGGG)<sub>n</sub>-adjacent gaps. These ambiguities are

66 represented in HG38 as strings of unknown nucleotides (“NNN’s”) intended to represent  
67 stretches of DNA with the number of “NN’s” corresponding to estimated basepair (bp) length of  
68 the gap from the existing subtelomeric reference to the end of each respective chromosome  
69 arm (21, 22).

70         These ambiguities in the reference sequence, along with knowledge gained from limited  
71 long-range mapping studies that many additional large subtelomeric structural variations likely  
72 remain to be characterized (23), make the routine use of subtelomeric reference sequences  
73 problematic. Stong et al. (24) updated subtelomeric assemblies by using telomere clones from a  
74 fosmid structural variation resource(25) to fill in relatively small (TTAGGG)<sub>n</sub>-adjacent sequence  
75 gaps in the clone-based reference sequence, and re-defined subtelomere coordinates that  
76 exclude the (TTAGGG)<sub>n</sub> tract itself in order to create a custom subtelomere reference  
77 assembly (“Stong Assembly”) useful for characterizing subtelomeric segmental duplications and  
78 extending the subtelomere paralogy blocks originally defined by Trask and co-workers (26). This  
79 resulted in an assembly significantly more useful for subtelomere characterization and short-  
80 read sequence mapping purposes than previous ones; subtelomeres were operationally defined  
81 as the distal 500 kb regions of each chromosome arm, and encompassed all known multi-  
82 telomere segmental duplications (Subtelomere Repeat Elements, SREs). The SREs comprise  
83 roughly 25 % of the entire subtelomere region and 80 % of the most distal 100 kb of these  
84 regions; each defined subtelomere region also contained a stretch of 1-copy subtelomere-  
85 specific DNA on its centromeric end that definitively connects it with the rest of the reference  
86 sequence (24). The improved subtelomere assemblies are still subject to ambiguities  
87 associated with a few remaining large telomere-adjacent gaps as well as many very large  
88 structural variations that define alternative long-range haplotypes for an unknown number of  
89 individual subtelomeres in human populations.

90         We have previously used single-molecule optical mapping to identify long-range  
91 haplotypes in human genomes (27, 28), and showed that long (average 300kb) molecules

92 mapped using this procedure can span segmental duplications in subtelomeres and connect  
93 chromosome ends to 1-copy arm-specific DNA (22). Here we extend our analyses using high  
94 throughput optical mapping of large single DNA molecules in nanochannel arrays for 154  
95 human genomes from 26 populations to present a comprehensive look at human subtelomere  
96 structure and variation. The results catalog many novel long-range subtelomere haplotypes and  
97 determine the frequencies and contexts of specific subtelomeric duplicons on each  
98 chromosome arm, helping to clarify the currently ambiguous nature of many specific  
99 subtelomeres as represented in the current reference sequence (HG38).

100

## 101 **Results:**

### 102 **Individual subtelomeric consensus maps containing large SRE regions**

103 Subtelomeric repeat element (SRE) regions are located in the most distal stretches of human  
104 subtelomeres. Long SRE regions of about 300 kb have been identified in some alleles of the 1p,  
105 8p and 11p telomeres, whereas 7 telomeres have minimal or no SRE content (17, 24, 29, 30).  
106 Most SRE regions are 40–150 kb in size (24). Physical linkage of 1-copy regions with telomeres  
107 on single large DNA molecules capable of spanning SRE regions is required for assembling  
108 individual subtelomeric consensus maps. Recently-developed high-throughput single-molecule  
109 genome mapping methods are well-suited for this challenge. In this method, genomic DNA is  
110 labeled at sites recognized by a sequence motif-specific Nicking endonuclease, long genomic  
111 DNA fragments are isolated and imaged in nanochannel arrays to a high depth of coverage and  
112 contigs of these large genomic DNA fragments are assembled from these data. In our case, these  
113 maps are then compared with in silico-generated maps of subtelomeric reference sequences. Fig  
114 1 shows the consensus map (yellow) and constituent single-molecules (brown) of the 3q  
115 subtelomere from the GM191025 genome aligned with HG38 reference (blue) and the 3q  
116 assembly from Stong et al. (2014; top). The paralog blocks of SREs are shown in the colored  
117 rectangles defined in Stong et al. (2014). The long DNA molecules shown here are at least

118 0.35Mb, reaching into the single copy region of the 3q arm. Their good alignment in the  
119 single copy region indicates these molecules belong to 3q. These molecules also contain 130  
120 kb of extra sequences beyond the end of the incomplete HG38 reference and Stong et al.  
121 assembly; the nicking pattern of this extra sequence is consistent with paralogy blocks 1-5 as  
122 shown (dashed boxes on top of the molecules in Fig. 1). The GM191025 genome map  
123 indicates there is 130 kb of DNA extending beyond the end of the HG38 reference sequence  
124 (teal arrow), including 60 kb accounted for by the gap sequence (black arrow). All of this  
125 additional DNA is associated with previously-identified SRE paralogy blocks.

126 **Discovery of novel subtelomeric structural variants, resolution of sequence gaps and**  
127 **delineation of long-range subtelomeric haplotypes across 154 genomes.**

128 To gain better insight into the subtelomeric regions, we next analyzed genome maps of  
129 subtelomeric regions of 154 human genomes selected from the 1000 genome project (31).  
130 These genomes include 3 males and 3 females from each of the 26 ethnic regions of the world.  
131 By using this large and diverse sample set, we hope to form a more accurate representation of  
132 haplotypes and variations found in the subtelomeric regions of all chromosome arms.

133 **Highly Variable Subtelomeres.** Out of 46 chromosome arms, 18 (1p, 2q, 3q, 5q, 6p,  
134 6q, 7p, 7q, 8p, 9p, 9q, 11p, 14q, 15q, 16q, 17q, 19p, 20p) are classified as highly variable.  
135 These are arms where structurally variant haplotypes were found in more than 10% of the total  
136 genomes analyzed (22). Fig 2 (A, B, C, D, E, F) summarizes the distribution of haplotypes for  
137 each of these highly variable chromosome arms. The consensus maps of these subtelomeric  
138 regions show a wide range of variation between genomes, most strikingly in the length and  
139 sequence content of sequence content of telomere-adjacent DNA segments. In many cases  
140 (1p, 6p, 7p, 9q, 11p, 16q, 19q, 20p), the HG38 reference doesn't represent the main haplotype.  
141 Fig 2 follows the same convention as in Fig 1, except the black dashed arrow signifies that a  
142 region of telomere-adjacent gap sequence in the HG38 reference should be deleted. A red 'T'  
143 indicates the Stong assembly reached the telomere sequences for that arm.

144

145           **1p:** For 96 genomes the chromosome starts near the 0.6Mb coordinate of the HG38  
146 reference chromosome 1p arm, and for another 17 genomes it starts around 0.5Mb of the hg38  
147 reference. The remaining 41 genomes failed to assemble. There are no perfectly aligned  
148 contigs between 0-0.5Mb of the HG38 reference. We confirmed this using an alternative  
149 labeling method, direct label enzyme (DLE; 33). In a separate study of 6 genomes, we tagged  
150 the telomeres with CRISPR-cas9, and found that all molecules in these genomes containing  
151 telomeres align to the hg38 reference starting at 0.6Mb (31, 32). Fig 3 contains an example of  
152 one of these telomere images. This indicates that the first 500kb in hg38 reference for  
153 chromosome 1p contains incorrectly mapped DNA; indeed, analysis of DNA from each of the  
154 sequenced clones from this 500 kb region indicate that it is comprised entirely of segmental  
155 duplications, explaining its incorrect mapping location.

156           **2q:** For 2q, there is a major haplotype with 110 genomes that matches well to the hg38  
157 reference. 20 genomes have an extension 45 kb more than the hg38 reference end. This is very  
158 similar in size to a 50 kb polymorphism at 2q detected independently using RARE cleavage  
159 mapping (33). 3 genomes start at 242.12Mb, and DNA from the remaining 21 genomes failed to  
160 assemble a contig at this telomere.

161           **3q:** 72 genomes extend 130 kb beyond the Stong assembly and hg38 reference as  
162 shown for GM191025 (Fig 1). The genome map pattern of this region indicates that these  
163 genomes contain paralogy blocks 1-5, which are lacking in both the hg38 reference and the  
164 Stong Assembly (4). 5 genomes extend an additional 70 kb and contains paralogy blocks 23,  
165 24, 25 and 28. Another 10 genomes contain variable extensions beyond the reference, and 23  
166 genomes start at 198.16 Mb. DNA from 44 genomes failed to assemble a contig at this  
167 telomere.

168           **5q:** 135 genomes start at 181.48 Mb. 116 out of the 135 genomes match the hg38  
169 reference and 19 genomes of 135 genomes have alternative patterns in the last 30kb adjacent

170 to telomere. An additional 15 genomes start before 181.48Mb. None of these genomes contain  
171 181.48Mb-181.54Mb telomere adjacent gap Ns (the black dash arrow in Fig. 2), which should  
172 be deleted from the hg38 reference. DNA from 4 genomes failed to assemble a contig at this  
173 telomere.

174 **6p**: 69 genomes start near 0.05 Mb of the HG38 reference sequence and the patterns  
175 from 0.05Mb to 0.11Mb are significantly different to hg38. 50 genomes start at 0.0 Mb of hg38.  
176 Most of the 50 genomes contain additional paralogy block 1-3, and 20 such genomes are shown  
177 in Fig. 2. DNA from 35 genomes failed to assemble a contig at this telomere...

178 **6q**: 80 genomes match the hg38 reference. 66 genomes have different variations  
179 between 170.74-170.70Mb. One specific pattern containing 15 genomes is shown in Fig. 2. All  
180 of these haplotypes start near the 170.75 Mb of hg38 reference sequence, and do not contain  
181 the 60 kb telomere-adjacent gap Ns in the HG38 reference sequence. DNA from 8 genomes  
182 failed to assemble a contig at this telomere.

183 **7p**: The 7p subtelomeric region shows a wide range in haplotypes, and all contain extra  
184 sequences beyond the hg38 reference. 60 genomes contain 70kb extra sequences, which have  
185 the patterns of paralogy blocks of 6-7-8-9. An additional 5 contain 175 kb extra sequences,  
186 which comprise of paralogy blocks from 1 to 9, as shown in Fig. 2. 39 genomes contain variable  
187 extensions beyond hg38. DNA from 50 genomes did not generate complete assembly due to  
188 an INP site, starting at 0.08Mb.

189 **7q**: 125 genomes match the HG38 reference pattern exactly or have one extra nick site.  
190 17 genomes have 2 additional nick sites and extend 15 kb further than the major haplotype.  
191 DNA from the remaining 12 genomes failed to assemble a contig at this telomere.

192 **8p**: 104 genomes contain the major haplotype that matches the hg38 reference,  
193 stopping just before the telomere-adjacent gap Ns in HG38 that begin at 0.06Mb. 38 genomes  
194 start at 0.16Mb beginning with block 5 (lacking blocks 24, 25, 28, 19ab, 20 and 4). 11 genomes  
195 are the same length as the major haplotype but a different sequence composition for the last



196 0.09Mb. A set of 3 genomes (sharing one haplotype) out of 11 genomes containing blocks 1, 2,  
197 3 and 4 (but having alternate nicking patterns relative to the set of 3) are shown in Fig. 2.

198 **9p:** 110 genomes have a haplotype that agrees well with the HG38 reference. 20  
199 genomes have an extended region of 15kb with an unknown block, while 6 genomes have a  
200 much longer extended region (60kb or beyond the HG38 reference also unknown block). DNA  
201 from the remaining 18 genomes failed to assemble a contig at this telomere.

202 **9q:** 51 genomes extend 80kb beyond its distal end of hg 38 reference with blocks 3, 4  
203 and some unknown sequence as well. 77 genomes extend into the 60kb telomere adjacent gap  
204 Ns of hg38 reference. 15 of these 77 genomes shown in Fig.2 match until 138.3Mb and have an  
205 unknown block for their last 30kb region.

206 **11p:** 11p is highly variable. 41 genomes shown in Fig.2 extend 90kb beyond the  
207 telomere-adjacent gap boundary in HG38 reference and contain blocks 1,2,3,4. 80 genomes  
208 show variable extension into the 60kb telomere gap Ns. 20 genomes among this group extend  
209 0.11Mb from the telomere before matching the HG38 reference pattern and are shown in Fig 2.

210 **14q:** 95 genomes end at 106.7Mb and do not extend into the telomere gap adjacent Ns.  
211 61 of these genomes have minor differences from the other 34 genomes in the region 106.7Mb  
212 to 106.75Mb and in 106.85Mb to 106.86Mb region as seen in Fig. 2. This region is known to  
213 contain variable genes from the immunoglobulin G heavy chain cluster (34). DNA from the  
214 remaining 59 genomes failed to assemble a contig at this telomere.

215 **15q:** 114 genomes match well to the reference. 25 genomes are the same length but  
216 have variation from 101.95-101.97Mb. Our previous work (22) revealed what turns out to be a  
217 very rare haplotype of 15q with a 50kb extension. Only one genome in the current dataset  
218 matched that particular haplotype and it was identical to one from the prior study (GM12892).  
219 DNA from 14 genomes failed to assemble a contig at this telomere.

220 **16q:** 73 genomes match the HG 38 reference sequence length and extend only 0.02Mb  
221 into the telomere adjacent gap Ns. These match the Stong et al. (2014) 16q assembly. An

222 additional 48 genomes extend around 0.08Mb into the telomere adjacent gap Ns with several  
223 variations in this extension. As shown in Fig 2, 3 of these genomes also differ from the  
224 reference at 90.18Mb-90.23Mb and contains blocks 1, 2,3,4,5. Another 5 of these extended  
225 genomes match the reference but still include blocks 1, 2, 3, 4. DNA from 33 genomes failed to  
226 assemble a contig at this telomere.

227 **17q:** 105 genomes have a haplotype matching the reference. 19 genomes have a  
228 similar pattern but 83.22-83.24 contains variation. Fig 2 shows one example of this group with 3  
229 genomes. DNA from 30 genomes failed to assemble a contig.

230 **19p:** 62 genomes share a haplotype that matches the end of the reference sequence but  
231 is different from that reference at 0.12-0.2Mb, lacking block 5. 44 genomes match the reference  
232 and contain block 5. 10 of these 44 genomes extend 0.02Mb into the telomere adjacent gap Ns.  
233 DNA from 13 genomes have an 80kb extension with unknown blocks, exceeding the length of  
234 the telomere-adjacent gap Ns in the HG38 reference, 3 with the same variation from the  
235 reference at 0.12-0.2Mb. Fig 2 shows the 10 that extend and matches block 5 at 0.12Mb. 35  
236 genomes failed to assemble.

237 **20p:** All of the 135 genomes in 20p extend beyond the 60kb telomere-adjacent gap Ns  
238 (black arrow). 94 genomes extend 0.1Mb, 41 genomes extend 0.14Mb (with the distal 0.09Mb  
239 differing). DNA from 19 genomes failed to assemble a contig at this telomere.

240 **Subtelomeres with minimal structural variation.** 18 chromosome arms (1q, 2p, 3p,  
241 4p, 4q, 5p, 8q, 10p, 10q, 11q, 12p, 12q, 13q, 18p, 18q, 20q, 21q, XqYq) show minimal structural  
242 variation compared to the HG38 reference. Descriptions and figures depicting these arms can  
243 be found in the supplementary materials, Figs S1 to S7. Among these arms, inconsistencies  
244 with the current HG38 reference included 20 kb of extra gap DNA adjacent to the telomere at 8q  
245 of the HG38 reference, 110 kb of gap DNA adjacent to 18q of the HG38 reference, and 70 kb of  
246 extra gap DNA at 20q of the HG38 reference.

247           The current HG38 reference does not contain information on the p arms of the  
248 acrocentric chromosomes, 22p, 21p, 13p, 14p, and 15p, and thus could not be mapped to our  
249 single-molecule assemblies. However, in our recent study, genome maps pick up significant  
250 patterns of these acrocentric short-arm subtelomeres (31). For the XpYp, only a few genomes  
251 had contigs matching part of this region. They have similar patterns but variable spacing  
252 between the patterns (S6), and are located centromeric to a large hypervariable  
253 pseudoautosomal VNTR that has been associated with length polymorphisms up to 100 kb that  
254 would be expected to interfere with reference sequence assembly (34, 35).

255           Four subtelomeres (16p, 17p, 19q and 22q) have known inverted nick pair (INP) sites  
256 near the telomere with Nt.BspQ1 labeling, such that the genome maps can't extend to the  
257 telomeres. INP sites occur where the nicking enzymes sites are close together on opposing  
258 strands, leading to double stranded DNA breaks and thus interference with nick-label mapping.

259           We further characterized these 4 arms with DLE labeling (36) using a subset of  
260 genomes. The DLE enzyme does not nick the DNA, and intact molecules from this analysis  
261 confirmed the presence of INP sites using the nicking method. Based on this data, 19q and 22q  
262 show minimal variations and align well to the hg38 reference. 16p appears to have at least a  
263 second longer haplotype as suggested by some of the Nt.BspQ1 genomes, and they also had a  
264 longer minor haplotype shown with DLE. The existence of these structurally variant haplotypes  
265 is consistent with early PFGE mapping studies showing large subtelomeric polymorphisms at  
266 16p (37). Genomes labeled with the DLE enzyme showed large differences between mapping  
267 patterns for 17p compared with the HG38 reference and further characterization will be needed  
268 to accurately classify this arm. Previous 17p subtelomere mapping and sequencing studies  
269 showed several discrete large tandem repeat regions within 100 kb of the chromosome end  
270 based upon a telomere-containing half-YAC as well as large variations detected by RARE  
271 cleavage(30, 38). Both 17p features may be contributing to difficulties characterizing this  
272 subtelomere in the population. The DLE method also mapped very few contigs to arm XpYp,

273 only 10 out of 52 genomes, suggesting, as mentioned above, that the reference may be  
274 inaccurate or XpYp may be highly variable with the reference only reflecting one haplotype.

275 It is clear that the existing human genome reference (hg38) for highly variable  
276 subtelomeric regions is often incomplete, especially in the region immediately adjacent to  
277 telomere repeats. The uncertainty is often expressed in telomere-adjacent gap regions ranging  
278 from 5-160kb on the end of these chromosome arms in the hg38 reference, and these gap sizes  
279 correlate poorly with the actual sizes of the structurally variant alleles...

280 In some cases, we confirmed that extra genomic materials should be added to the end  
281 of some arms, such as 2q, 3q, 7p, 9p, 9q, 11p, 19p, and 20p, which can be easily verified by  
282 the extra genome map extensions (teal arrow in fig. 2 and supplementary fig. S1-S7). In other  
283 cases, none of the genome maps extend across these telomere-adjacent gaps, which suggests  
284 that the regions should be deleted. To further confirm the inaccuracy of specific telomere-  
285 adjacent gaps in HG38, we used CRISPR-Cas9 to label the telomere to indicate the end of the  
286 genome maps. Fig 3 shows the typical results of this analysis for chromosome arms 1p, 3q, 8p,  
287 14q, and 18q. The raw images of single DNA molecules were shown below the hg38 reference  
288 map (blue bar) and consensus genome map (yellow bar). For 8p, the green dots (Nt.BspQ1  
289 motifs) on the blue DNA backbone align really well with the reference map and consensus map.  
290 At the end of the molecule, telomeres are shown as a more intense green dot, which was  
291 labeled with CRISPR cas9 (32) . Without the CRISPR-cas9 labeling, molecules with the same  
292 nick site pattern lack the intense green end labels. This confirms that the approximately 60kb  
293 telomere-adjacent gap in the telomere-adjacent region of 8p is inaccurate. A similar conclusion  
294 can be drawn for 14q (160kb) and 18q (110kb). As discussed earlier the 1p reference appears  
295 inaccurate and contigs start much further toward the centromere. This is confirmed by the  
296 presence of the telomere. These extra portions should be deleted from hg38 reference. 3q is an  
297 example of an arm that has additional sequences beyond the current reference end.

298           Table 1 summarizes the detailed comparison between the mapping results and hg38  
299 reference for each chromosome arm. The range in number of genomes per arm is due to some  
300 genome assemblies not containing a consensus contig in the distal 500kb region of a  
301 chromosome arm. In addition, 5q, 13q, 15q, and 20p have more than 154 genomes, due to  
302 some genomes having two contigs (i.e., two long-range subtelomeric haplotypes) for an arm in  
303 a diploid genome. Table one also includes the current sizes of telomere-adjacent gaps  
304 designated in the HG38 reference sequence and the range the contig maps extended beyond  
305 that. Differences in telomere-adjacent gap sizes less than 10kb are unable to be distinguished  
306 and are estimated as 0. A negative number indicates there is excessive gap size, a positive  
307 number indicates insufficient gap size. For 1p and 17p the HG38 reference seems very  
308 inaccurate regardless of indicated gap size.  
309

310 **Table 1. Summary of Chromosomes**

| Chr Arm          | Samples Represented | Large-scale Var <sup>1</sup> | Hg38 Tel-adj Gap <sup>2</sup> (kb) | Map Extension <sup>3</sup> (kb) | Chr Arm          | Samples Represented | Large-scale Var <sup>1</sup> | Hg38 Tel-adj Gap <sup>2</sup> (kb) | Map Extension <sup>3</sup> (kb) |
|------------------|---------------------|------------------------------|------------------------------------|---------------------------------|------------------|---------------------|------------------------------|------------------------------------|---------------------------------|
| 1p               | 113                 | High                         | inaccurate                         | N/A                             | 1q               | 144                 | Low                          | 10                                 | 0                               |
| 2p               | 130                 | Low                          | 10                                 | 0                               | 2q               | 133                 | High                         | 10                                 | 0-45                            |
| 3p               | 143                 | Low                          | 10                                 | 0                               | 3q               | 110                 | High                         | 60                                 | 70-140                          |
| 4p               | 124                 | Low                          | 10                                 | 0                               | 4q <sup>5</sup>  | 133                 | N/A                          | 10                                 | N/A                             |
| 5p               | 152                 | Low                          | 10                                 | 0                               | 5q               | 150                 | High                         | 60                                 | -60                             |
| 6p               | 119                 | High                         | 60                                 | 0                               | 6q               | 146                 | High                         | 60                                 | -60                             |
| 7p               | 104                 | High                         | 10                                 | 100-175                         | 7q               | 142                 | High                         | 10                                 | 0                               |
| 8p               | 153                 | High                         | 60                                 | -60                             | 8q               | 151                 | Low                          | 60                                 | -20                             |
| 9p               | 136                 | High                         | 10                                 | 5-55                            | 9q               | 128                 | High                         | 60                                 | -40-20                          |
| 10p              | 146                 | Low                          | 10                                 | 0                               | 10q <sup>5</sup> | 151                 | N/A                          | 10                                 | N/A                             |
| 11p              | 121                 | High                         | 60                                 | 0-80                            | 11q              | 137                 | Low                          | 10                                 | -15                             |
| 12p              | 145                 | Low                          | 10                                 | 0                               | 12q              | 147                 | Low                          | 10                                 | -20                             |
| 13p              | N/A                 | N/A                          | N/A                                | N/A                             | 13q              | 152                 | Low                          | 10                                 | 0                               |
| 14p              | N/A                 | N/A                          | N/A                                | N/A                             | 14q              | 95                  | High                         | 160                                | -160                            |
| 15p              | N/A                 | N/A                          | N/A                                | N/A                             | 15q              | 140                 | High                         | 10                                 | 0                               |
| 16p <sup>4</sup> | 153                 | Low                          | 10                                 | -10                             | 16q              | 121                 | High                         | 110                                | -20                             |
| 17p <sup>4</sup> | 127                 | Low                          | inaccurate                         | N/A                             | 17q              | 124                 | High                         | 10                                 | -20                             |
| 18p              | 144                 | Low                          | 10                                 | 0                               | 18q              | 150                 | Low                          | 110                                | -110                            |
| 19p              | 119                 | High                         | 60                                 | 10                              | 19q <sup>4</sup> | 150                 | Low                          | 10                                 | 0                               |
| 20p              | 135                 | High                         | 60                                 | 30-70                           | 20q              | 148                 | Low                          | 110                                | -70                             |
| 21p              | N/A                 | N/A                          | N/A                                | N/A                             | 21q              | 115                 | Low                          | 10                                 | 0                               |
| 22p              | N/A                 | N/A                          | N/A                                | N/A                             | 22q <sup>4</sup> | 153                 | Low                          | 10                                 | 0                               |
| X/Yp             | 33                  | Low                          | 10                                 | N/A                             | X/Yq             | 139                 | Low                          | 10                                 | 0                               |

311

312 Caption: Table 1 contains the number of contigs from the 154 genomes present in each arm,  
 313 the current amount of Ns in the hg38 reference padding, the range of the map extension lengths  
 314 (if any), and the classification of each arm as High or Low variability. This is determined by  
 315 looking at the total number of genomes for an arm, and how many were the majority haplotype  
 316 vs the minor. If the minor haplotype was less than 10% the total, the arm is considered low  
 317 variability. The acrocentric arms 13p, 14p, 15p, 21p, 22p cannot be determined due to the lack  
 318 of reference. 4q and 10q have a known repeat D4Z4 in the subtelomeric region and are also  
 319 excluded (43). For differences in reference gap and contig length being less than 10kb it is  
 320 unable to be determined precisely and is estimated as 0. A negative number indicates the gap

321 estimated in the reference is longer than seen in the arm and a positive number indicates the  
322 arm is longer than the gap estimated. For 1p and 17p the HG38 reference is very inaccurate.

323 Superscripts:

324 1- If the minor haplotype was less than 10% the total haplotypes for the arm, the arm is  
325 considered low variability.

326 2 - The reference is inaccurate to the point where the size of the telomere adjacent gap of the  
327 reference cannot be evaluated

328 3 - For gap differences of <10kb, accuracy is unclear. These arms appear to be within the  
329 correct size range. N/A refers to arms that could not accurately be judged, including the  
330 acrocentric arms 13p, 14p, 15p, 21p, 22p. In addition, 4q and 10q contain a known D4Z4  
331 repeat leading to widely variable ranges (35).

332 4 -contain INP sites, and this may affect data that could determine high vs low variability.

333 5 – Can be considered high variability with respect to high levels of large D4Z4 tandem repeat  
334 variability in the populations.

335

336

### 337 **Population structure of paralogy blocks in subtelomeric regions**

338 We used the consensus Bionano maps to identify subtelomeric paralogy blocks based  
339 upon the similarity of their nicking patterns to representative paralogy blocks defined first by  
340 Linardopoulou et al. and then extended by Stong et al. (24, 26). We then explored the  
341 population structure of specific subtelomeric paralogy blocks and combinations of adjacent  
342 subtelomeric paralogy blocks on each chromosome arm in the 154 genomes at the super-  
343 population level; 42 Africans (AFR), 30 Ad Mixed Americans (AMR), 30 East Asians (EAS), 24  
344 Europeans (EUR) and 28 South Asians (SAS) (31).

345 Paralogy blocks 3, 5 and 9 are each relatively large and have distinct nick-labeling  
346 patterns generated by using the nicking enzyme Nt.BspQ1. Some smaller paralogy blocks lack  
347 a Nt.BspQ1 nicking site or have only a few, but consistently occur adjacent to and in the same  
348 orientation with other small blocks; in these cases we combined paralogy blocks to identify  
349 distinctive nicking patterns. Thus, combined blocks 1-2, 6-7-8, and 10-25-11-12 were analyzed

350 as three distinctive segments. Fig 4 shows the distribution of paralogy blocks 3, 5, 9, and 1-2 on  
351 chromosome arms 15q, 16q and 9q.

352 Block 3 has an uneven distribution between super populations, with its occurrence being  
353 chromosome- and population-dependent. Chromosome arms 3q, 6q, 15q, and 19p show a  
354 higher prevalence of block 3 in the majority of people with similar frequencies among super  
355 populations. Chromosome arms 2q, 5q, 6p, 7p, 8p, 9q, and 16q have lower prevalence of block  
356 3 among all super populations. Arm 16q is statistically ( $p < 0.05$ , Bonferroni correction) lower in  
357 the African super population compared to the other 4 super populations. Table S1 contains a  
358 detailed breakdown of the frequency of this block. This confirms the previous analysis of cosmid  
359 f7501 (with DNA sequence nearly identical to a portion of block 2 and half of block 3 ) by Trask  
360 et al, where fluorescence in situ hybridization localized the sequence on almost all genomes for  
361 3q, 15q, 19p and only on a few genomes for 7p from African pygmy tribes (39). Block 3 is  
362 commonly found with Block 1 and 2. Block 1 and 2 show similar trends as block 3 on arm 16q,  
363 where block 1-2 is significantly more common in the African super population than the other  
364 super populations. Block 1-2 is found in just 3 genomes for chromosome arm 8p, all belonging  
365 to the African super population (Table S1), but it is not statistically different than other super  
366 populations.

367 Block 5 also has an uneven distribution between super populations (Fig 4). Block 5 has  
368 higher prevalence on chromosome arms 3q, 5q, 6p, 6q, 8p, 11p, and 15q with similar  
369 distributions between super populations (Table 2). However, block 5 has higher distribution on  
370 chromosome arms 9q and 16q in the AFR super population. Our results support the findings of  
371 previous studies of this paralogy block that could signify recent human divergence (39). Block 5  
372 may have only spread to 9q and 16q in African populations after the other ancestral populations  
373 left Africa, resulting in its appearance there primarily in African populations. Alternatively, it may  
374 have spread to these arms prior to the divergence but became reduced in frequency in non-  
375 African populations due to genetic drift in those populations that left.



376 Table 2. Distribution of Block 5 by Population

| Block 5 | AFR with Block 5 / Total AFR maps | AMR with Block 5 / Total AMR maps | EAS with Block 5 / Total EAS maps | EUR with Block 5 / Total EUR maps | SAS with Block 5 / Total SAS maps |
|---------|-----------------------------------|-----------------------------------|-----------------------------------|-----------------------------------|-----------------------------------|
| 2q      | 0%                                | 0%                                | 0%                                | 0%                                | 4%                                |
| 3q      | 54%                               | 61%                               | 76%                               | 65%                               | 35%                               |
| 5q      | 88%                               | 90%                               | 97%                               | 92%                               | 82%                               |
| 6p      | 56%                               | 41%                               | 21%                               | 22%                               | 32%                               |
| 6q      | 83%                               | 77%                               | 62%                               | 78%                               | 80%                               |
| 7p      | 7%                                | 0%                                | 0%                                | 3%                                | 7%                                |
| 8p      | 81%                               | 81%                               | 67%                               | 88%                               | 78%                               |
| 9q      | 62%                               | 30%                               | 48%                               | 32%                               | 15%                               |
| 11p     | 49%                               | 42%                               | 21%                               | 43%                               | 35%                               |
| 15q     | 93%                               | 97%                               | 97%                               | 92%                               | 93%                               |
| 16q     | 14%                               | 0%                                | 0%                                | 0%                                | 4%                                |
| 19p     | 10%                               | 27%                               | 47%                               | 18%                               | 19%                               |

377  
 378 Caption: Table 2 shows the frequency of Block 5 on different chromosomes (rows) for each  
 379 super population (column). AFR stands for the Africa super population category, AMR for Ad  
 380 Mixed American, EAS for East Asian, EUR for European, and SAS for South Asian. Based on  
 381 the Stong reference block 5 had previously been found on 5q, 6p, 6q, 8p, 11p, 15q, and 19p. In  
 382 our dataset it was also found on 2q, 3q, 7p, 9q, and 16q.

383  
 384

385 Blocks group 9, group 6-7-8, and group 10-25-11-12 do not show any statistically  
 386 significant differences in frequencies between super populations.

387 Arms including 3q, 2q, 9p, 9q, 11p, 15q, 17p, and 19p have additional extended regions  
 388 compared to the HG38 reference. These extended regions don't belong to any known paralogy  
 389 blocks. These could represent new combinations of existing subtelomeric segmental duplication  
 390 material, or subtelomeric insertions of material from elsewhere in the genome. Most of the  
 391 arms show even distributions of the extended regions between super populations, except arms  
 392 17p and 9p. These two arms have extra extensions only in AFR super population, but with  
 393 relatively low frequencies.

394           At the super population level, in general, paralogy blocks are present at equal frequency  
395 on all five super-populations on most of the chromosome arms that contain the paralogy blocks.  
396 However, a few chromosome arms show significantly different frequencies of paralogy blocks  
397 (blocks 1-5 and additional extended regions beyond the HG38 reference) in the African super-  
398 population. These paralogy blocks are DNA segments immediately adjacent to the telomere,  
399 which may be associated with their relatively rapid duplication and spread amongst multiple  
400 human subtelomeres.

401

## 402 **DISCUSSION**

403           In this study we utilized optical mapping (27, 40) for 154 individual genomes. We used  
404 long DNA molecules (>150kb) and a minimum coverage depth of 60x for each genome. For  
405 each genome, every chromosome arm was compared with the hg38 reference and the Stong  
406 subtelomeric reference (24). The current hg38 reference contains telomere-adjacent gaps  
407 represented by strings of “N”s corresponding to missing base pairs in the reference. Our data  
408 shows that these telomere-adjacent gaps are frequently inaccurate and represent both  
409 structural variations as well as sequence gaps. Like our previous 6 sample study, we were able  
410 to detect new long range haplotypes (22); here we created a much more comprehensive catalog  
411 of these alternative haplotypes and their relative frequencies in different populations. 18  
412 chromosome arms (1p, 2q, 3q, 5q, 6p, 6q, 7p, 7q, 8p, 9p, 9q, 11p, 14q, 15q, 16q, 17q, 19p,  
413 20p) are classified as highly variable (minor haplotypes comprised more than 10% of the total  
414 genomes). 18 other chromosome arms (1q, 2p, 3p, 4p, 4q, 5p, 8q, 10p, 10q, 11q, 12p, 12q,  
415 13q, 18p, 18q, 20q, 21q, XqYq) showed minimal variations compared to the hg38 reference  
416 sequences.

417           Specific subtelomeres from some genomes failed to assemble and/or map to the  
418 reference genome. The reason for this is unclear. These failures may be due to problems of

419 short molecule lengths or low labeling density causing samples to form shorter contigs than  
420 normal. The individual genomes missing subtelomere assemblies were not consistent,  
421 precluding non-specific DNA fragmentation in certain samples as the cause for these failures to  
422 assemble.

423         Using these mapping data, we also examined the distribution of the Stong reference  
424 paralogy blocks between the 5 super populations. Block group 1-2, block 3, and block 5 showed  
425 a statistically significant prevalence on chromosome arm 16q, in the AFR super population over  
426 the other super populations. There is not a significant difference on other arms or in the other  
427 blocks.

428         Some genomes had haplotypes with extension beyond the hg38 reference which did not  
429 match any known block in the Stong reference. These also seemed to be more prevalent AFR  
430 super population, as the others did not contain the unknown block extension. However, this  
431 novel extension in AFR was not statistically significant, possibly due to the small sample size.

432         From this dataset, we can speculate on the timeline of the development of the paralogy  
433 blocks in subtelomeric regions based on their distribution between super populations. In the  
434 case of block 3, it is very common on 3 arms, rare on 3 other chromosomes and not found on  
435 the rest. Chromosome arms 3q, 15q, and 19p show heavy prevalence of block 3 with a majority  
436 of people in all populations having the block, so block 3 may have spread to these arms first and  
437 later in 3 chromosome arms (7p, 16p, 16q) where only a few genomes have block 3. Only 16q  
438 was significantly different than the other blocks. These distribution differences could be  
439 attributed to human migration out of Africa. The development of block 3 on 3q, 15q and 19p  
440 likely predates the migration and subsequent expansion of human populations out of Africa (41).  
441 7p, 16p and 16q potentially developed their instance of block 3 after the initial migration, and  
442 spread to all populations remaining in Africa. Alternatively, it may have existed but not yet  
443 become a fixed allele at the time of migration and lost over time to genetic drift, and thus not be  
444 found in non-African populations. However, arms 2q, 5q, 6p, and 8p do not share this

445 segregation, as their block 3 is present in small frequencies (<10%) and evenly distributed  
446 among super populations. The reasons for this even distribution are unknown. It could be that  
447 the mechanisms of subtelomeric diversity have led to each of these populations simultaneously  
448 developing them independently. The exact mechanisms of subtelomeric variation remains  
449 undetermined. Overall, these results support the findings of a previous study of paralogy block  
450 3 that used 8 isolated ethnic groups (2 Pygmy groups, Melanesian, 2 Amerindian, Khmer, Druze  
451 and Caucasian, 45 total genomes) and 8 primate genomes, that signifies a recent human  
452 divergence (39).

453 Other paralogy block groups, such as block group 6-7-8, showed different trends, where  
454 a majority of all populations had the block and there were no statistically significant difference  
455 between super populations for any arm. These blocks are likely to have developed and spread  
456 to the arms earlier than the unevenly distributed blocks.

457 This work catalogs a large number of novel long-range subtelomere haplotypes and  
458 determines their frequencies and contexts in terms of specific subtelomeric duplicons on each  
459 chromosome arm. This information will provide mapping guideposts for their eventual sequence  
460 determination, and helps to clarify the currently ambiguous nature of many specific subtelomere  
461 structures as represented in the current reference sequence (HG38). As such, this information  
462 is an essential step in understanding the impact of subtelomeric cis-sequences on transcription  
463 of TERRA and other functional subtelomeric RNAs and their roles in regulating single-telomere  
464 lengths and function, as well as delineating the population structure and evolution of highly  
465 variable human subtelomere regions.

466

#### 467 **Methods:**

##### 468 **High molecular weight DNA extraction.**

469 Mammalian cells were embedded in gel plugs and High Molecular Weight DNA was purified as  
470 described in a commercial large DNA purification kit (BioRad #170-3592). Plugs were incubated

471 with lysis buffer and proteinase K for four hours at 50°C. The plugs were washed and then  
472 solubilized with GELase (Epicentre). The purified DNA was subjected to four hours of drop-  
473 dialysis. It was quantified using Quant-iTdsDNA Assay Kit (Life Technology), and the quality  
474 was assessed using pulsed-field gel electrophoresis.

475

#### 476 **DNA labeling.**

477 The DNA was labeled with nick-labeling (42) as described previously using the IrysPrep  
478 Reagent Kit (BioNano Genomics). Specifically, 300 ng of purified genomic DNA was nicked with  
479 7 U nicking endonuclease Nt.BspQI (New England BioLabs, NEB) at 37°C for two hours in NEB  
480 Buffer 3.1. The nicked DNA was labeled with a fluorescent-dUTP nucleotide analog using Taq  
481 polymerase (NEB) for one hour at 72°C. After labeling, the nicks were ligated with Taq ligase  
482 (NEB) in the presence of dNTPs. The backbone of fluorescently labeled DNA was stained with  
483 YOYO-1 (Invitrogen).

484 A subset of the samples were labeled using the newer Direct Label Enzyme (DLE) method  
485 (Bionano Genomics). These samples used the DNA Labeling Kit-DLS 80005 and followed the  
486 manufacturer's instructions. In Summary, 750ng of the gDNA was labeled using DLE-1 enzyme  
487 and reaction mix followed by Proteinase K digestion (Qiagen). The DNA back bone was stained  
488 after drop dialysis. The stained sample was then homogenized and incubated at room  
489 temperature over nigh before quantified using Qubit dsDNA HS Kit (Invitrogen).

490

#### 491 **Data collection.**

492 The DNA was loaded onto the nano-channel array of BioNano Genomics IrysChip by  
493 electrophoresis of DNA. Linearized DNA molecules were imaged using a custom made whole  
494 genome mapping system. The DNA backbone (outlined by YOYO-1 staining) and locations of  
495 fluorescent labels along each molecule were detected using an in-house image detection  
496 software. The set of label locations relative to the DNA backbone for each DNA molecule

497 defines an individual single-molecule map. A commercial version of this whole-genome mapping  
498 and imaging system (Irys) is available from Bionano Genomics.

499

#### 500 **De novo genome map assembly.**

501 Single-molecule maps were assembled *de novo* into consensus maps using software tools  
502 developed at BioNano Genomics, specifically Refaligner and Assembler (1). Briefly, the  
503 assembler is a custom implementation of the overlap-layout-consensus paradigm with a  
504 maximum likelihood model. An overlap graph was generated based on pairwise comparison of  
505 all molecules as input. Redundant and spurious edges were removed. The assembler outputs  
506 the longest path in the graph and consensus maps were derived. Consensus maps are further  
507 refined by mapping single molecule maps to the consensus maps and label positions are  
508 recalculated. Refined consensus maps are extended by mapping single molecules to the ends  
509 of the consensus and calculating label positions beyond the initial maps. After merging of  
510 overlapping maps, a final set of consensus maps was output and used for subsequent analysis.  
511 The map assemblies are very robust to the relatively small errors in labeling (10% false positive,  
512 due to extra nickings at wrong sites, and 10% false negative, due to missing nicks). This does  
513 not affect the maps and haplotype calls as the haplotypes are both are based on multiple  
514 nicking sites and multiple single molecules.

515

#### 516 **Block Definition.**

517 Subtelomeric paralogy blocks originally defined by Linardopoulou et al and extended/refined by  
518 Stong et al., (24, 26) are sequence segments of highly similar duplicated subtelomeric DNA that  
519 can be identified as discrete contiguous duplicated DNA segments in subtelomere reference  
520 assemblies(24). Paralogy blocks were characterized for mapping purposes by the pattern of  
521 nick sites in the representative sequenced reference paralogy block or set of adjacent paralogy  
522 blocks. These nicking patterns were then compared with the subtelomere regions of maps

523 generated for each genome. Block boundaries were identified by a qualitative comparison  
524 based on the distance between nick sites and their pattern on several arms with shared blocks.

525 **Statistical analysis of paralogy blocks in super population**

526 An analysis of variance (ANOVA) was calculated on the block presence per genome, grouped by  
527 super population. A Bonferroni correction was then performed to determine significance  
528 between the 4 super populations. This statistical analysis was repeated independently for each  
529 paralogy block or block group analyzed.

530

532 **SUPPLEMENTARY DATA**

533 Available online

534

535 **ACKNOWLEDGEMENTS**

536 Part of the informatics analysis was run on hardware supported by Drexel's University

537 Research Computing Facility. We thank Bionano Genomics Inc. for assistance in data

538 generation and bioinformatics support.

539

540 **FUNDING**

541 R01HG005946 (MX and PYK). R21CA177395 (MX and HR), R01CA140652 (HR).

542



543 **REFERENCES**

- 544 1. Azzalin CM, Reichenbach P, Khoriantuli L, Giulotto E, Lingner J. Telomeric repeat containing RNA  
545 and RNA surveillance factors at mammalian chromosome ends. *Science*. 2007;318(5851):798-801.
- 546 2. Porro A, Feuerhahn S, Delafontaine J, Riethman H, Rougemont J, Lingner J. Functional  
547 characterization of the TERRA transcriptome at damaged telomeres. *Nature Communications*. 2014;5.
- 548 3. Porro A, Feuerhahn S, Reichenbach P, Lingner J. Molecular Dissection of Telomeric Repeat-  
549 Containing RNA Biogenesis Unveils the Presence of Distinct and Multiple Regulatory Pathways.  
550 *Molecular and Cellular Biology*. 2010;30(20):4808-17.
- 551 4. Deng Z, Norseen J, Wiedmer A, Riethman H, Lieberman PM. TERRA RNA Binding to TRF2  
552 Facilitates Heterochromatin Formation and ORC Recruitment at Telomeres. *Molecular Cell*.  
553 2009;35(4):403-13.
- 554 5. Chu H-P, Cifuentes-Rojas C, Kesner B, Aeby E, Lee H-G, Wei C, et al. TERRA RNA Antagonizes  
555 ATRX and Protects Telomeres. *Cell*. 2017;170(1):86-101.e16.
- 556 6. Britt-Compton B, Rowson J, Locke M, Mackenzie I, Kipling D, Baird DM. Structural stability and  
557 chromosome-specific telomere length is governed by cis-acting determinants in humans. *Human*  
558 *Molecular Genetics*. 2006;15(5):725-33.
- 559 7. Graakjaer J, Bischoff C, Korshohn L, Holstebro S, Vach W, Bohr VA, et al. The pattern of  
560 chromosome-specific variations in telomere length in humans is determined by inherited, telomere-near  
561 factors and is maintained throughout life. *Mechanisms of Ageing and Development*. 2003;124(5):629-40.
- 562 8. Graakjaer J, Der-Sarkissian H, Schmitz A, Bayer J, Thomas G, Kolvraa S, et al. Allele-specific  
563 relative telomere lengths are inherited. *Human Genetics*. 2006;119(3):344-50.
- 564 9. Nergadze SG, Farnung BO, Wischniewski H, Khoriantuli L, Vitelli V, Chawla R, et al. CpG-island  
565 promoters drive transcription of human telomeres. *Rna-a Publication of the Rna Society*.  
566 2009;15(12):2186-94.
- 567 10. Caslini C, Connelly JA, Serna A, Broccoli D, Hess JL. MLL Associates with Telomeres and Regulates  
568 Telomeric Repeat-Containing RNA Transcription. *Molecular and Cellular Biology*. 2009;29(16):4519-26.
- 569 11. Deng Z, Campbell AE, Lieberman PM. TERRA, CpG methylation and telomere heterochromatin  
570 Lessons from ICF syndrome cells. *Cell Cycle*. 2010;9(1):69-74.
- 571 12. Yehezkel S, Segev Y, Viegas-Pequignot E, Skorecki K, Selig S. Hypomethylation of subtelomeric  
572 regions in ICF syndrome is associated with abnormally short telomeres and enhanced transcription from  
573 telomeric regions. *Human Molecular Genetics*. 2008;17(18):2776-89.
- 574 13. Kermouni A, Vanroost E, Arden KC, Vermeesch JR, Weiss S, Godelaine D, et al. THE IL-9  
575 RECEPTOR GENE (IL9R) - GENOMIC STRUCTURE, CHROMOSOMAL LOCALIZATION IN THE  
576 PSEUDOAUTOSOMAL REGION OF THE LONG ARM OF THE SEX-CHROMOSOMES, AND IDENTIFICATION  
577 OF IL9R PSEUDOGENES AT 9QTER, 10PTER, 16PTER, AND 18PTER. *Genomics*. 1995;29(2):371-82.
- 578 14. Linardopoulou EV, Parghi SS, Friedman C, Osborn GE, Parkhurst SM, Trask BJ. Human  
579 subtelomeric WASH genes encode a new subclass of the WASP family. *Plos Genetics*. 2007;3(12):2477-  
580 85.
- 581 15. Linardopoulou E, Mefford HC, Nguyen O, Friedman C, van den Engh G, Farwell DG, et al.  
582 Transcriptional activity of multiple copies of a subtelomerically located olfactory receptor gene that is  
583 polymorphic in number and location. *Human Molecular Genetics*. 2001;10(21):2373-83.
- 584 16. Mah N, Stoehr H, Schulz HL, White K, Weber BHF. Identification of a novel retina-specific gene  
585 located in a subtelomeric region with polymorphic distribution among multiple human chromosomes.  
586 *Biochimica Et Biophysica Acta-Gene Structure and Expression*. 2001;1522(3):167-74.
- 587 17. Riethman H, Ambrosini A, Castaneda C, Finklestein J, Hu XL, Mudunuri U, et al. Mapping and  
588 initial analysis of human subtelomeric sequence assemblies. *Genome Research*. 2004;14(1):18-28.

- 589 18. Cabianca DS, Casa V, Bodega B, Xynos A, Ginelli E, Tanaka Y, et al. A long ncRNA links copy  
590 number variation to a polycomb/trithorax epigenetic switch in FSHD muscular dystrophy. *Cell*.  
591 2012;149(4):819-31.
- 592 19. Lou Z, Wei J, Riethman H, Baur JA, Voglauer R, Shay JW, et al. Telomere length regulates ISG15  
593 expression in human cells. *Aging-Us*. 2009;1(7):608-21.
- 594 20. Robin JD, Ludlow AT, Batten K, Magdinier F, Stadler G, Wagner KR, et al. Telomere position  
595 effect: regulation of gene expression with progressive telomere shortening over long distances. *Genes &*  
596 *Development*. 2014;28(22):2464-76.
- 597 21. Church DM, Schneider VA, Graves T, Auger K, Cunningham F, Bouk N, et al. Modernizing  
598 Reference Genome Assemblies. *PLOS Biology*. 2011;9(7):e1001091.
- 599 22. Young E, Pastor S, Rajagopalan R, McCaffrey J, Sibert J, Mak AC, et al. High-throughput single-  
600 molecule mapping links subtelomeric variants and long-range haplotypes with specific telomeres.  
601 *Nucleic acids research*. 2017.
- 602 23. Riethman H. Human subtelomeric copy number variations. *Cytogenet Genome Res*. 2008;123(1-  
603 4):244-52.
- 604 24. Stong N, Deng Z, Gupta R, Hu S, Paul S, Weiner AK, et al. Subtelomeric CTCF and cohesin binding  
605 site organization using improved subtelomere assemblies and a novel annotation pipeline. *Genome*  
606 *Research*. 2014;24(6):1039-50.
- 607 25. Kidd JM, Cooper GM, Donahue WF, Hayden HS, Sampas N, Graves T, et al. Mapping and  
608 sequencing of structural variation from eight human genomes. *Nature*. 2008;453(7191):56-64.
- 609 26. Linardopoulou EV, Williams EM, Fan Y, Friedman C, Young JM, Trask BJ. Human subtelomeres  
610 are hot spots of interchromosomal recombination and segmental duplication. *Nature*. 2005;437.
- 611 27. Lam ET, Hastie A, Lin C, Ehrlich D, Das SK, Austin MD, et al. Genome mapping on nanochannel  
612 arrays for structural variation analysis and sequence assembly. *Nature Biotechnology*. 2012;30(8):771-6.
- 613 28. Mak ACY, Lai YYY, Lam ET, Kwok T-P, Leung AKY, Poon A, et al. Genome-Wide Structural  
614 Variation Detection by Genome Mapping on Nanochannel Arrays. *Genetics*. 2015.
- 615 29. Alkan C, Sajjadian S, Eichler EE. Limitations of next-generation genome sequence assembly. *Nat*  
616 *Methods*. 2011;8(1):61-5.
- 617 30. Riethman HC, Xiang Z, Paul S, Morse E, Hu XL, Flint J, et al. Integration of telomere sequences  
618 with the draft human genome sequence. *Nature*. 2001;409(6822):948-51.
- 619 31. Levy-Sakin M, Pastor S, Mostovoy Y, Li L, Leung AKY, McCaffrey J, et al. Genome maps across 26  
620 human populations reveal population-specific patterns of structural variation. *Nature Communications*.  
621 2019;10(1):1025.
- 622 32. McCaffrey J, Young E, Lassahn K, Sibert J, Pastor S, Riethman H, et al. High-throughput single-  
623 molecule telomere characterization. *Genome research*. 2017;27(11):1904-15.
- 624 33. Macina RA, Negorev DG, Spais C, Ruthig LA, Hu XL, Riethman HC. SEQUENCE ORGANIZATION OF  
625 THE HUMAN-CHROMOSOME 2Q TELOMERE. *Human Molecular Genetics*. 1994;3(10):1847-53.
- 626 34. Inglehearn CF, Cooke HJ. A VNTR immediately adjacent to the human pseudoautosomal  
627 telomere. *Nucleic acids research*. 1990;18(3):471-6.
- 628 35. Brown WR. A physical map of the human pseudoautosomal region. *EMBO J*. 1988;7(8):2377-85.
- 629 36. Genomics B. Bionano Prep Direct Label and Stain (DLS) Protocol 2018 [Available from:  
630 [https://bionanogenomics.com/wp-content/uploads/2018/04/30206-Bionano-Prep-Direct-Label-and-](https://bionanogenomics.com/wp-content/uploads/2018/04/30206-Bionano-Prep-Direct-Label-and-Stain-DLS-Protocol.pdf)  
631 [Stain-DLS-Protocol.pdf](https://bionanogenomics.com/wp-content/uploads/2018/04/30206-Bionano-Prep-Direct-Label-and-Stain-DLS-Protocol.pdf).
- 632 37. Wilkie AOM, Higgs DR, Rack KA, Buckle VJ, Spurr NK, Fischel-Ghodsian N, et al. Stable length  
633 polymorphism of up to 260 kb at the tip of the short arm of human chromosome 16. *Cell*.  
634 1991;64(3):595-606.
- 635 38. Xiang Z, Hu XL, Flint J, Riethman HC. A Sequence-Ready Map of the Human Chromosome 17p  
636 Telomere. *Genomics*. 1999;58(2):207-10.

- 637 39. Trask BJ, Friedman C, Martin-Gallardo A, Rowen L, Akinbami C, Blankenship J, et al. Members of  
638 the olfactory receptor gene family are contained in large blocks of DNA duplicated polymorphically near  
639 the ends of human chromosomes. *Human Molecular Genetics*. 1998;7(1):13-26.
- 640 40. Hastie AR, Dong L, Smith A, Finklestein J, Lam ET, Huo N, et al. Rapid Genome Mapping in  
641 Nanochannel Arrays for Highly Complete and Accurate De Novo Sequence Assembly of the Complex  
642 *Aegilops tauschii* Genome. *Plos One*. 2013;8(2).
- 643 41. Mefford HC, Trask BJ. The complex structure and dynamic evolution of human subtelomeres.  
644 *Nature Reviews Genetics*. 2002;3:91+.
- 645 42. Xiao M, Phong A, Ha C, Chan T-F, Cai D, Leung L, et al. Rapid DNA mapping by fluorescent single  
646 molecule detection. *Nucleic acids research*. 2007;35(3).
- 647 43. Zeng W, Chen Y-Y, Newkirk DA, Wu B, Balog J, Kong X, et al. Genetic and Epigenetic  
648 Characteristics of FSHD-Associated 4q and 10q D4Z4 that are Distinct from Non-4q/10q D4Z4 Homologs.  
649 *Human Mutation*. 2014;35(8):998-1010.

650

651

652

653 **Figure Captions:**

654

655 Figure 1. Example of a long-range haplotype in subtelomeric regions supported by single  
656 molecule evidence

657 Caption: Colored rectangles represent paralogy blocks defined in the subtelomere  
658 assemblies of Stong et al. (2014). The blue bar shows the hg38 reference with Nt.BsPQ1 nick  
659 sites as dark blue dashes along it. The yellow bar shows the consensus contig for this sample,  
660 with dark green marks indicating a match to the reference and lighter green/blue showing nick  
661 sites without a reference match. The colored rectangles about the yellow bar show the paralogy  
662 blocks that match the pattern seen in the extended region. The brown rows indicate single  
663 molecules, which extend well past the block regions and into the single copy region. A teal  
664 arrow shows the distance, 70kb, from the telomere as defined by the Bionano single-molecule  
665 maps to the end of the HG38 reference assembly. A black arrow represents 60 kb of unknown  
666 sequence currently in the HG38 reference as 'N', an estimate of gap size to the end of the  
667 chromosome. Dashed boxes on top of the molecules indicate portions of the extended region  
668 that match to paralogy blocks 1-5 but are not in the current references for 3q. A red T indicates  
669 the telomeric end of the 3q map.

670

671 Figure 2. Major haplotypes for highly variable arms.

672 Caption: The Stong et al. assembly blocks are shown as colored rectangles above blue  
673 Bionano genome mapping bars. Yellow rows with green ticks show haplotypes below these. A  
674 teal arrow indicates the size of additional extended regions not covered by the reference. A  
675 black arrow represents unknown sequence currently in the HG38 reference as 'N', an estimate  
676 of gap size to the end of the chromosome. If the black arrow is dashed it signifies a region of  
677 unknown telomere-adjacent gap sequence that should be deleted. A red T indicates the Stong  
678 2014 assembly reached the telomere, and the lack of one means that assembly was unable to  
679 reach the telomere repeats. Each highly variable arm is included here. Figure 2A shows 1p, 2q,  
680 and 3q. Figure 2B shows 5q, 6p, and 6q. Figure 2C shows arms 7p, 7q, and 8p. Figure 2D  
681 shows 9p, 9q and 11p. Figure 2E illustrates 14q, 15q, 16q and Figure 2F has arms 17q, 19p  
682 and 20p.

683 Figure 3. Telomere Labeling Shows sizes of telomere-adjacent gaps in subtelomeres.

684 Caption: Blue bars represent the nick sites in hg38 reference. Yellow bars with green  
685 Nt.BsPQ1 nick sites represent the main haplotype seen in the genomes. A black dashed arrow  
686 indicated the width of the telomere-adjacent gap sequence that should be deleted from the hg38  
687 reference. An image below the haplotype shows a single telomere labeled molecule confirming  
688 the end of the chromosome arm. These telomeres were labeled using CRISPR-Cas9 to tag the  
689 telomere repeat and incorporate a fluorophore(32). None of the subtelomeric haplotypes for  
690 each of these arms extends past the telomere label shown here.

691

692 Figure 4. Distribution of Paralogy Block 5 in 15q, 16q and 9q.

693 Caption: The solid color rectangle bars show the paralogy blocks defined in the  
694 subtelomeric assemblies of Stong et al. (2014). The narrow grey line segments to the right of  
695 the colored blocks show the single-copy DNA region. Blue rectangles with dark blue lines show  
696 the HG38 reference with Nt.BsPQ1 nick sites. Paralogy block five is shown as a dashed blue  
697 rectangle on top of yellow rows representing consensus maps for particular genomes. Additional

698 paralogy blocks are also shown as dashed colored rectangles. A teal arrow indicates the size of  
699 additional extended regions not covered by the reference. A black arrow represents unknown  
700 sequence currently in the HG38 reference as 'N', an estimate of gap size to the end of the  
701 chromosome. If the black arrow is dashed it signifies a region of unknown telomere-adjacent  
702 gap sequence that should be deleted.  
703

#### 704 **Supporting Information Legends:**

705 Fig S1-S7: Comprehensive Analysis of Human Subtelomeres by Whole Genome Mapping

706 S1-S7 Caption: Supplemental figures S1 through S7 show the major haplotypes for each  
707 chromosome arm in the less variable set of subtelomeres. The Stong Assembly paralogy blocks  
708 are shown as colored rectangles above blue Bionano optical mapping bars. Yellow rows with  
709 green ticks show haplotypes below these. A teal arrow indicates the size of additional extended  
710 regions not covered by the reference. A black arrow indicates the region indicated as a  
711 telomere-adjacent gap in the HG38 reference sequence. If the black arrow is dashed it signifies  
712 a region that should be deleted. Each low-variability arm is briefly described here.

713 Supplemental Table 1: Block Frequencies by Chromosome and Superpopulation.

714 Caption: Table S1 shows the frequency of Block 1-2, Block 3, Block 6-7-8, Block 9, and Blocks  
715 10-11-25-12 on different chromosomes (rows) for each super population (column). AFR stands  
716 for the Africa super population category, AMR for Ad Mixed American, EAS for East Asian, EUR  
717 for European, and SAS for South Asian.

718

719

720

#### 721 **Figures:**

722

723 Figure 1. Extended Haplotypes in subtelomeric regions of 3q in GM191025 supported by single  
724 molecule evidence

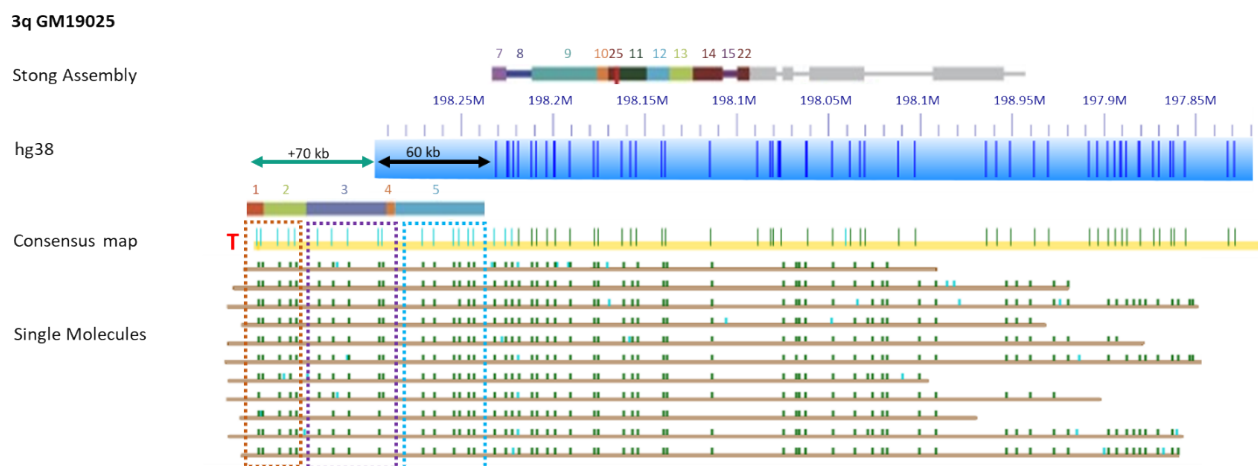

725

726

727

728

729 Figure 2. Major Haplotypes of Highly Variable Subtelomere Regions (A, B, C, D, E, F)  
730

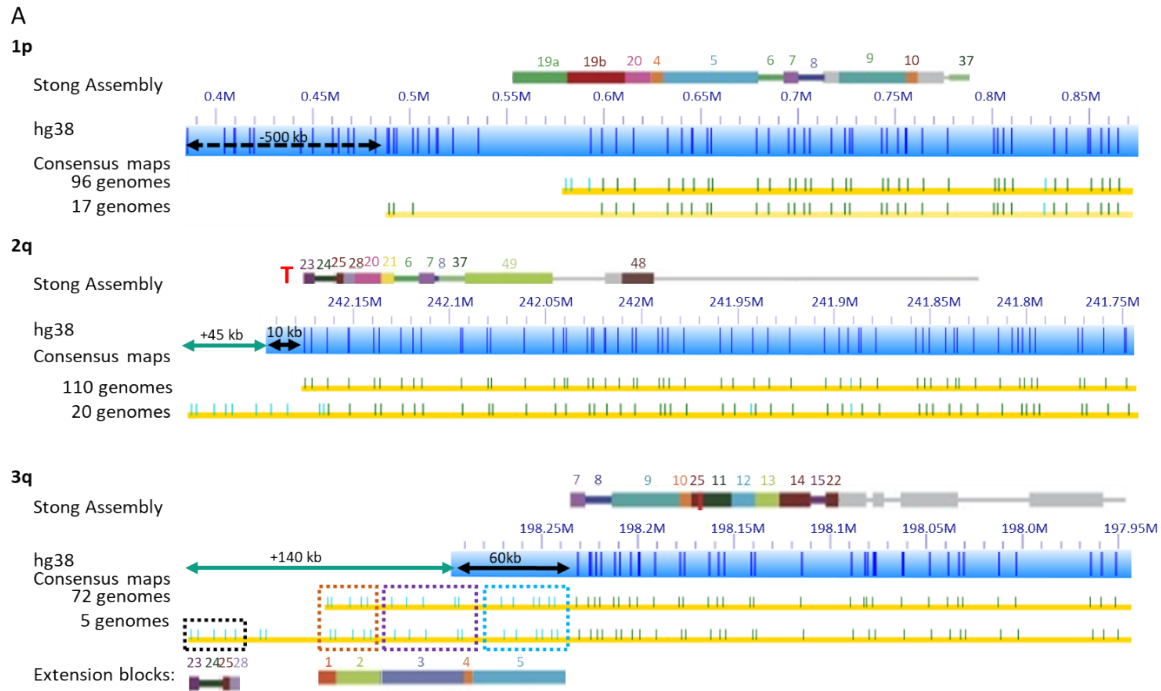

731  
732

B

5q

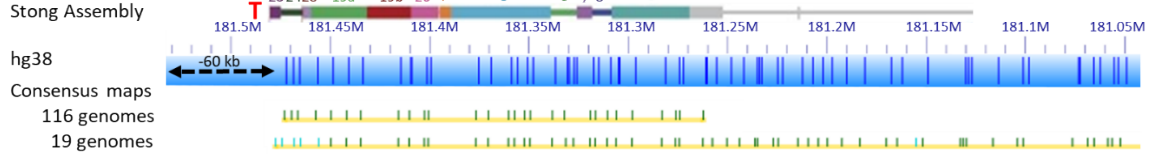

6p

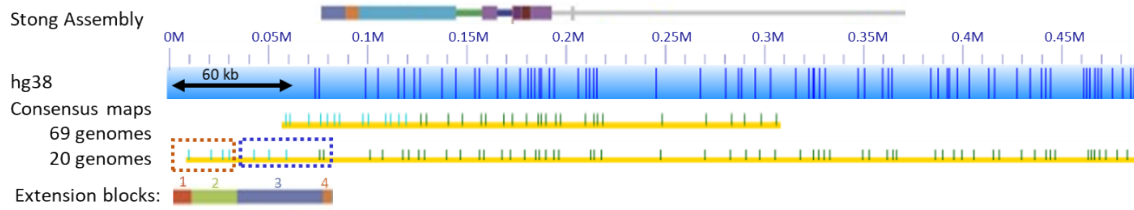

6q

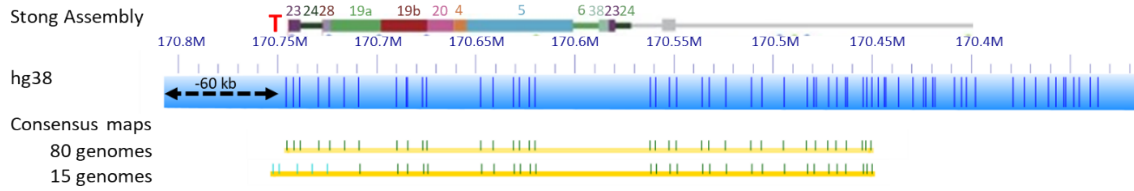

733  
734

735  
736

C

7p

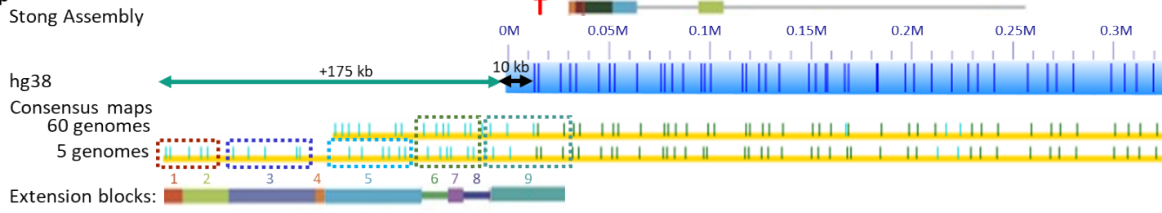

7q

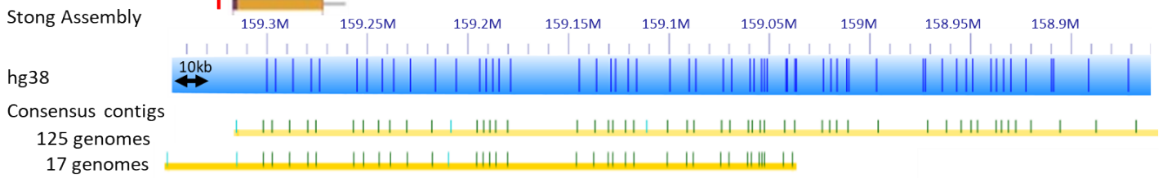

8p

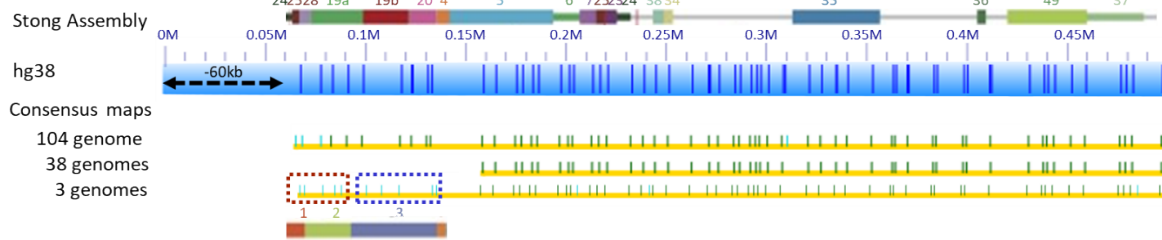

737  
738



739  
740

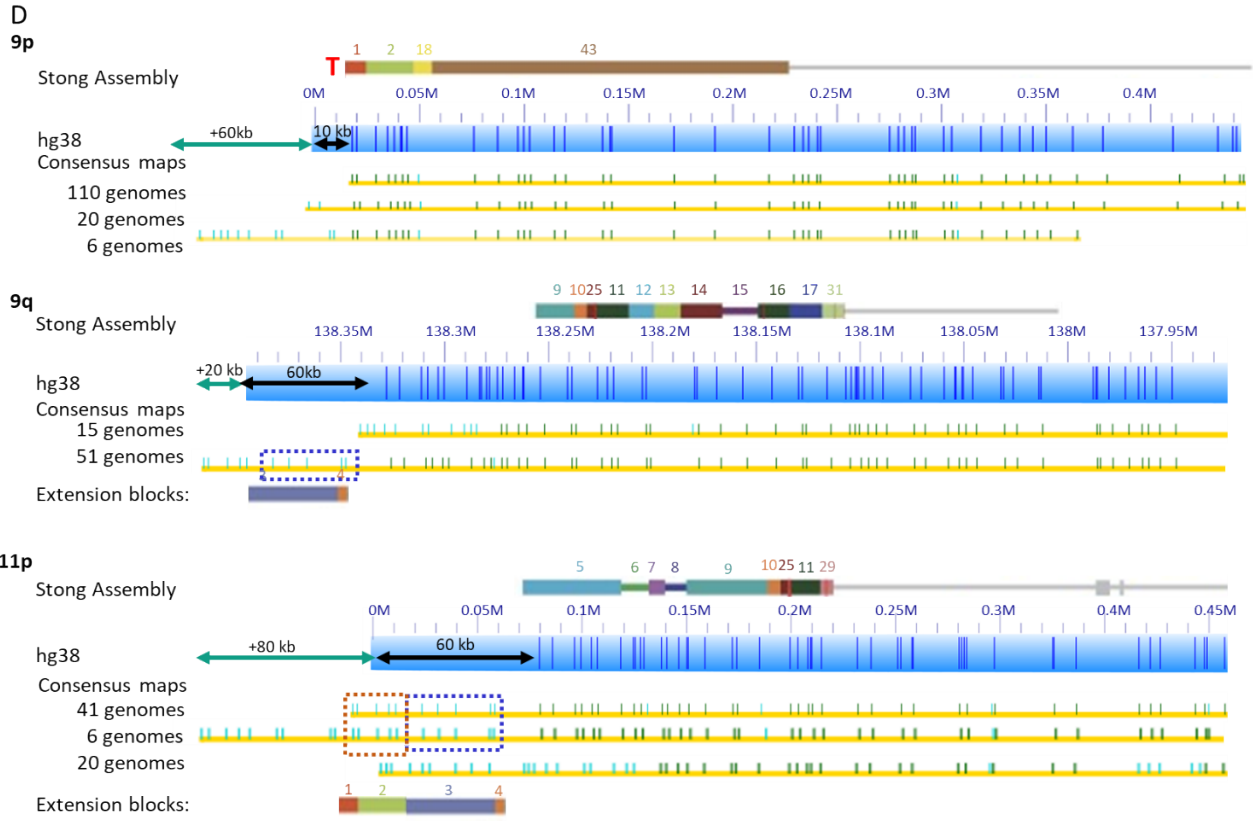

741  
742

E

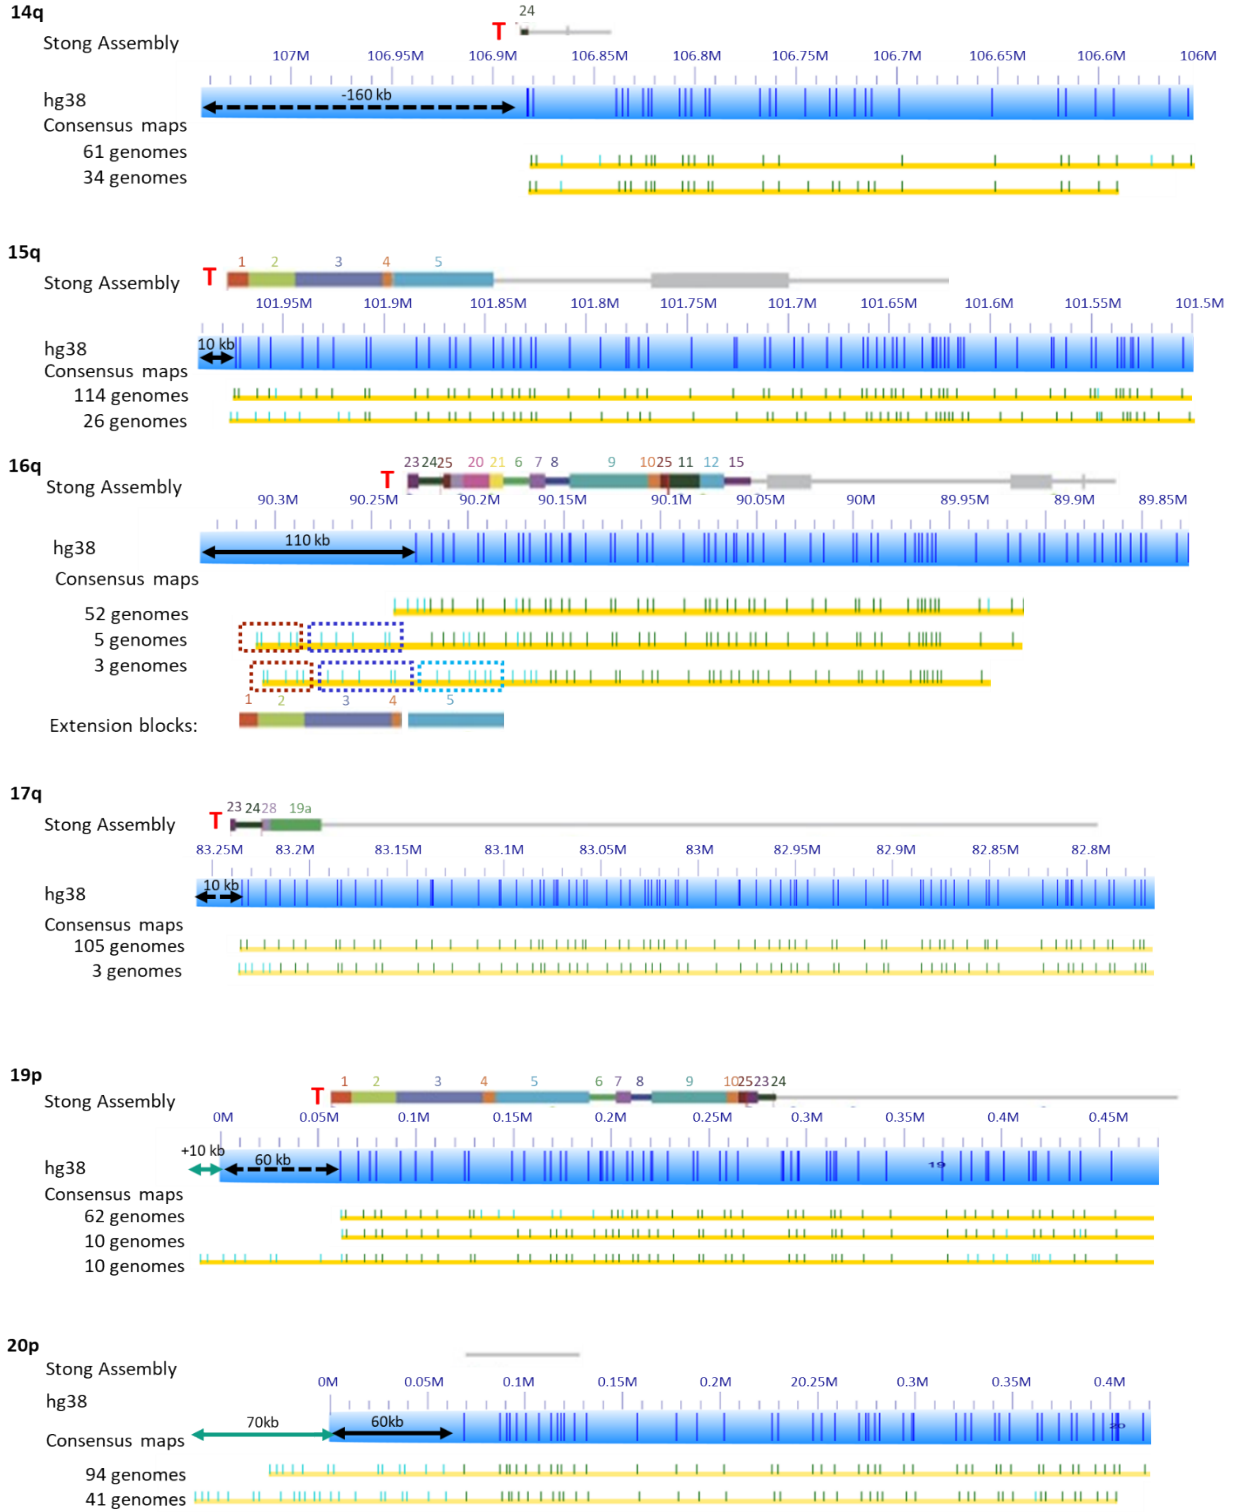

743

744

745 Figure 3. Telomere Labeling Shows Inaccurate Sizing of Telomere-adjacent Gap Segments in  
746 HG38 Subtelomere Regions  
747

Figure 3. Telomere Labeling Shows Inaccurate Padding of Subtelomeric Regions

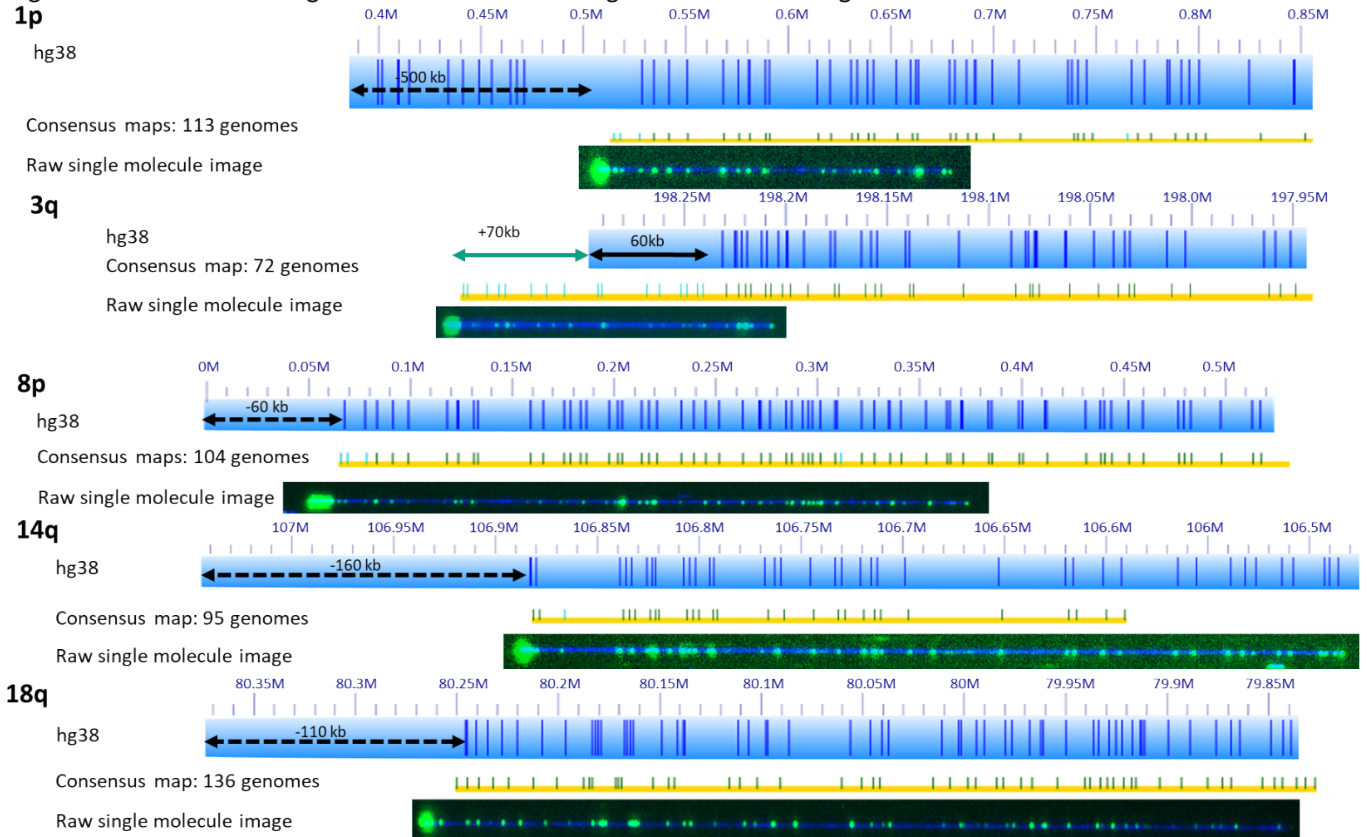

748  
749

750 Figure 4. Distribution of Paralogy Block 5 in 15q, 16q and 9q.  
751

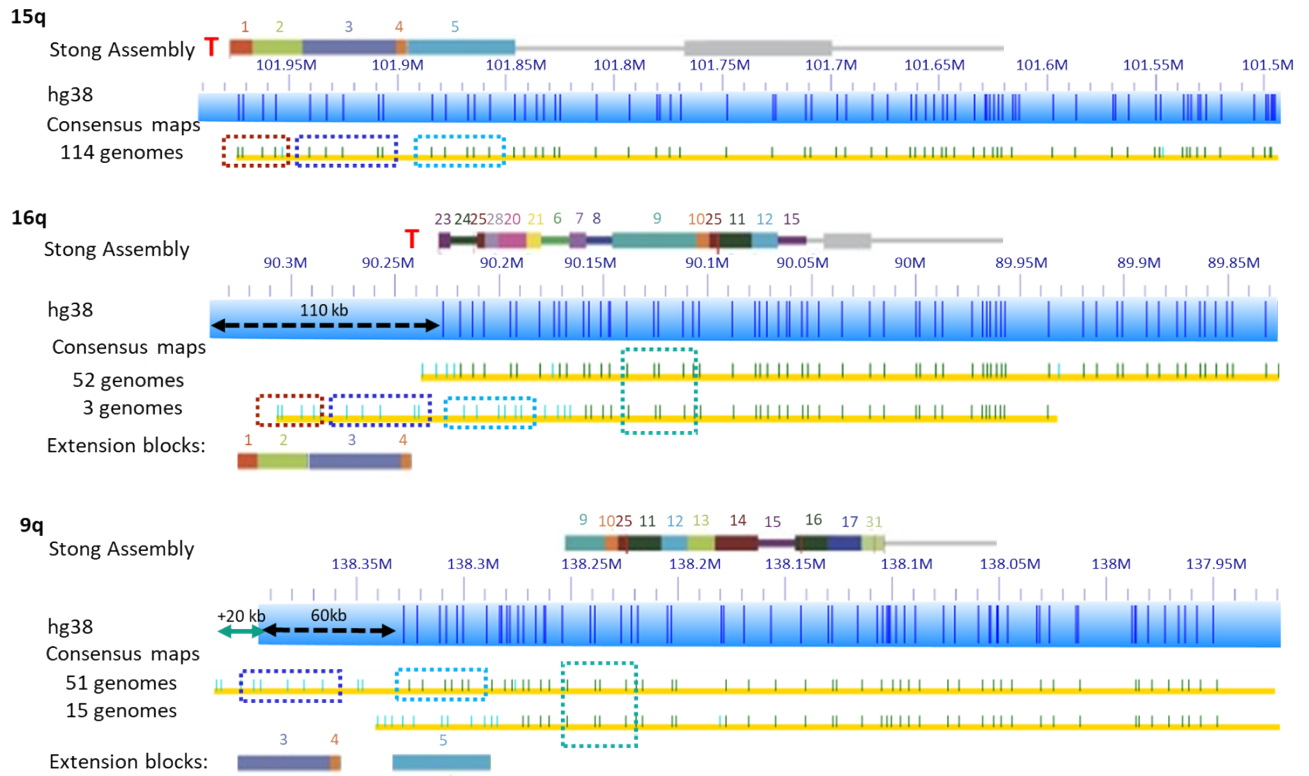

752
